# Supplementary material for: A toxin-mediated policing system in Bacillus optimizes division of labor via penalizing cheater-like nonproducers
Source: eLife. 2023 Apr 25;12:e84743. doi: 10.7554/eLife.84743 (PMC10171868; doi:10.7554/eLife.84743)
Supplement: Figure 3—source data 1. [file elife-84743-fig3-data1.xlsx]

## Sheet: Sheet1
Figure 3 - Source Data 1
Figure 3B: Quantification of the inhibition zone inhibition zones observed in Figure 3A.
Summary Statistics (arithmetic from GraphPad Prism 8)
Type A		Type B	t	DF	Two-tailed P-value		P-value summary		Significantly different? (P<0.05)
WT(SQR9)	vs.	ΔdegU	0.4804	4	0.6561		ns		No
	vs.	ΔcomPA	0.3073	4	0.774		ns		No
	vs.	ΔabrB	1.145	4	0.3162		ns		No
	vs.	ΔsinI	0.2177	4	0.8383		ns		No
	vs.	ΔsinR	0.3502	4	0.7438		ns		No
	vs.	Δspo0A	3.931	4	0.0171		*		Yes
	vs.	Δspo0A/spo0A	0.2691	4	0.8012		ns		No
Source Data
		SQR9	ΔdegU	ΔcomPA	ΔabrB	ΔsinI	ΔsinR	Δspo0A	Δspo0A/spo0A
Inhibition zone diameter (mm):		6.00412	7.06728	7.31934	7.84778	6.68287	6.76237	3.90141	6.17
		5.88732	5.76056	5.3662	6.14085	5.64789	5.66197	3.19434	6.06
		7.49722	7.66208	7.4926	8.23988	7.55154	7.81444	4.57751	6.71
