# Supplementary material for: A toxin-mediated policing system in Bacillus optimizes division of labor via penalizing cheater-like nonproducers
Source: eLife. 2023 Apr 25;12:e84743. doi: 10.7554/eLife.84743 (PMC10171868; doi:10.7554/eLife.84743)
Supplement: Figure 3—source data 2. [file elife-84743-fig3-data2.xlsx]

## Sheet: Sheet1
Figure 3 - Source Data 2
Figure 3D: Quantification of fluorescence in liquid culture. The expression level of eps, tapA, bnaF, and bnaAB in wild-type SQR9, Δspo0A, and Δspo0A/spo0A, as monitored by using gfp reporters fused to the corresponding promoters.
Summary Statistics (arithmetic from GraphPad Prism 8)
Peps-gfp:
Type A		Type B	t	DF	Two-tailed P-value		P-value summary		Significantly different? (P<0.05)
WT(SQR9)	vs.	Δspo0A	5.915	4	0.0041		**		Yes
	vs.	Δspo0A/spo0A	0.5706	4	0.5988		ns		No
PtapA-gfp:
Type A		Type B	t	DF	Two-tailed P-value		P-value summary		Significantly different? (P<0.05)
WT(SQR9)	vs.	Δspo0A	3.086	4	0.0367		*		Yes
	vs.	Δspo0A/spo0A	0.6233	4	0.5669		ns		No
PbnaF-gfp:
Type A		Type B	t	DF	Two-tailed P-value		P-value summary		Significantly different? (P<0.05)
WT(SQR9)	vs.	Δspo0A	5.171	4	0.0066		**		Yes
	vs.	Δspo0A/spo0A	0.9271	4	0.4064		ns		No
PbnaAB-gfp:
Type A		Type B	t	DF	Two-tailed P-value		P-value summary		Significantly different? (P<0.05)
WT(SQR9)	vs.	Δspo0A	9.134	4	0.0008		***		Yes
	vs.	Δspo0A/spo0A	0.1456	4	0.8913		ns		No
Source Data
	Gene Strain	SQR9			Δspo0A			Δspo0A/spo0A
RFU/OD600:	Peps-gfp	18500000	17300000	23300000	7080000	9340000	8150000	15500000	17000000	22000000
	PtapA-gfp	20900000	37800000	23100000	11100000	8470000	12100000	28000000	27700000	37800000
	PbnaF-gfp	36300000	44300000	39200000	19200000	20400000	27200000	39200000	39700000	69600000
	PbnaAB-gfp	56300000	47100000	46500000	18200000	20700000	20900000	44300000	56300000	47200000
