# Supplementary material for: A toxin-mediated policing system in Bacillus optimizes division of labor via penalizing cheater-like nonproducers
Source: eLife. 2023 Apr 25;12:e84743. doi: 10.7554/eLife.84743 (PMC10171868; doi:10.7554/eLife.84743)
Supplement: Figure 4—source data 1. [file elife-84743-fig4-data1.xlsx]

## Sheet: Sheet1
Figure 4 - Source Data 1
Figure 4B: Quantification of fluorescence in liquid culture. The expression level of accDA in wild-type SQR9, Δspo0A, and Δspo0A/spo0A, as monitored by using the PaccDA-gfp reporter.
Summary Statistics (arithmetic from GraphPad Prism 8)
PaccDA-gfp:
Type A		Type B	t	DF	Two-tailed P-value		P-value summary		Significantly different? (P<0.05)
WT(SQR9)	vs.	Δspo0A	2.85	4	0.0464		*		Yes
	vs.	Δspo0A/spo0A	0.6405	4	0.5567		ns		No
Source Data
		SQR9	Δspo0A	Δspo0A/spo0A
	RFU/OD600:	28600000	17300000	24600000
		43000000	19500000	36300000
		28100000	20400000	27200000
