# Supplementary material for: A toxin-mediated policing system in Bacillus optimizes division of labor via penalizing cheater-like nonproducers
Source: eLife. 2023 Apr 25;12:e84743. doi: 10.7554/eLife.84743 (PMC10171868; doi:10.7554/eLife.84743)
Supplement: Figure 4—source data 2. [file elife-84743-fig4-data2.xlsx]

## Sheet: Sheet1
Figure 4 - Source Data 2
Figure 4D: Quantification of the inhibition zones observed in Figure 4C.
Summary Statistics (arithmetic from GraphPad Prism 8)							Sum Sq = Sum of squares;DF= degrees of freedom;Mean Sq = Mean Squares
	inhibition zone diameter formed by strain SQR9
	ANOVA table	Sum Sq	DF	Mean Sq	F (DFn, DFd)	P value
	Treatment (between columns)	0.1533	2	0.07663	F (2, 6) = 0.1310	P=0.8797
	Residual (within columns)	3.51	6	0.585
	Total	3.663	8
	inhibition zone diameter formed by strain SQR9-Pxyl-accDA
	ANOVA table	Sum Sq	DF	Mean Sq	F (DFn, DFd)	P value
	Treatment (between columns)	66.12	2	33.06	F (2, 6) = 41.14	P=0.0003
	Residual (within columns)	4.821	6	0.8035
	Total	70.94	8
Source Data
			Xylose Strain	SQR9			SQR9-Pxyl-accDA
Inhibition zone diameter (mm):			0	5.90103	6.76701	5.83918	0	0	0
			0.1%	6.14845	6.55052	5.34433	3.43858	5.26599	4.13909
			0.2%	7.47835	6.11753	5.40619	5.57056	7.94619	6.08832
