# Supplementary material for: A toxin-mediated policing system in Bacillus optimizes division of labor via penalizing cheater-like nonproducers
Source: eLife. 2023 Apr 25;12:e84743. doi: 10.7554/eLife.84743 (PMC10171868; doi:10.7554/eLife.84743)
Supplement: Figure 5—source data 1. [file elife-84743-fig5-data1.xlsx]

## Sheet: Sheet1
Figure 5 - Source Data 1
Figure 5B: Quantification of the proportion of the active cells (%) and average FITC in wild-type SQR9, SQR9ΔbnaV, and SQR9-P43-bnaAB, as monitored by Peps-gfp and PtapA-gfp reporters using flow cytometry.
Summary Statistics (arithmetic from GraphPad Prism 8)							Sum Sq = Sum of squares;DF= degrees of freedom;Mean Sq = Mean Squares
	Proportion of active cells (%):	Peps-gfp
	ANOVA table	Sum Sq	DF	Mean Sq	F (DFn, DFd)	P value
	Treatment (between columns)	845.3	2	422.6	F (2, 6) = 333.4	P<0.0001
	Residual (within columns)	7.607	6	1.268
	Total	852.9	8
	Proportion of active cells (%):	PtapA-gfp
	ANOVA table	Sum Sq	DF	Mean Sq	F (DFn, DFd)	P value
	Treatment (between columns)	1257	2	628.4	F (2, 6) = 19.96	P=0.0022
	Residual (within columns)	188.9	6	31.48
	Total	1446	8
	Average FITC:	Peps-gfp
	ANOVA table	Sum Sq	DF	Mean Sq	F (DFn, DFd)	P value
	Treatment (between columns)	4208891	2	2104445	F (2, 6) = 28.64	P=0.0009
	Residual (within columns)	440891	6	73482
	Total	4649782	8
	Average FITC:	PtapA-gfp
	ANOVA table	Sum Sq	DF	Mean Sq	F (DFn, DFd)	P value
	Treatment (between columns)	5888326	2	2944163	F (2, 6) = 216.8	P<0.0001
	Residual (within columns)	81468	6	13578
	Total	5969794	8
Source Data
				SQR9	SQR9ΔbnaV	SQR9-P43-bnaAB
		Proportion of active cells (%):	Peps-gfp	97.8	73.5	93
				97.4	75	91.3
				97.3	76.4	93.8
				SQR9	SQR9ΔbnaV	SQR9-P43-bnaAB
		Proportion of active cells (%):	PtapA-gfp	94.6	76.3	77.1
				95.7	65.6	80.6
				95.7	57.4	80.7
				SQR9	SQR9ΔbnaV	SQR9-P43-bnaAB
		Average FITC:	Peps-gfp	3255	1615	2268
				3594	1731	2721
				3715	2213	2682
				SQR9	SQR9ΔbnaV	SQR9-P43-bnaAB
		Average FITC:	PtapA-gfp	2560	1069	597
				2682	1220	615
				2334	1043	638
