# Supplementary material for: A toxin-mediated policing system in Bacillus optimizes division of labor via penalizing cheater-like nonproducers
Source: eLife. 2023 Apr 25;12:e84743. doi: 10.7554/eLife.84743 (PMC10171868; doi:10.7554/eLife.84743)
Supplement: Figure 5—source data 2. [file elife-84743-fig5-data2.xlsx]

## Sheet: Sheet1
Figure 5 - Source Data 2
Figure 5D: Pellicle weight dynamics of wild-type SQR9, SQR9ΔbnaV, and SQR9-P43-bnaAB in MSgg medium under normal or stressed conditions (H2O2, tetracycline, or 7% NaCl).
Source Data
MSgg:			Time (h) Strain	SQR9			SQR9ΔbnaV			SQR9-P43-bnaAB
	Weight of biofilm (g)		18	0.0165	0.0342	0.0335	0.0199	0.0113	0.016	0.0181	0.0135	0.0121
			24	0.0445	0.0502	0.0538	0.0392	0.0416	0.0302	0.0264	0.0435	0.027
			32	0.0713	0.0439	0.0444	0.0708	0.034	0.0421	0.0534	0.0447	0.0535
			48	0.0478	0.0387	0.054	0.0398	0.0407	0.0484	0.0405	0.0447	0.0565
			72	0.0535	0.0416	0.0416	0.0411	0.043	0.0389	0.0298	0.0579	0.0231
			96	0.053	0.0417	0.0398	0.0331	0.0287	0.034	0.0289	0.0145	0.0291
			120	0.0446	0.0327	0.036	0.0197	0.0205	0.022	0.0198	0.033	0.0194
			144	0.0427	0.0256	0.0333	0.0186	0.0153	0.0231	0.022	0.0125	0.0196
			168	0.0142	0.0186	0.0103	0.0137	0.0192	0.0097	0.0094	0.0088	0.0167
MSgg (4 μg/mL tetracycline):			Time (h) Strain	SQR9			SQR9ΔbnaV			SQR9-P43-bnaAB
	Weight of biofilm (g)		24	0.0391	0.0295	0.0216	0.0051	0.019	0.0154	0.0111	0.0195	0.0082
			32	0.0501	0.0614	0.0478	0.0481	0.0547	0.0372	0.0286	0.0346	0.0302
			48	0.0544	0.0586	0.0552	0.0653	0.0485	0.0559	0.0471	0.049	0.063
			72	0.0506	0.0519	0.0427	0.0303	0.0451	0.0618	0.0548	0.0454	0.0366
			96	0.0412	0.0489	0.0466	0.035	0.0421	0.0333	0.033	0.0352	0.0302
			120	0.0402	0.0435	0.0344	0.025	0.0173	0.035	0.0281	0.0354	0.0132
			144	0.0457	0.0343	0.0285	0.0249	0.0229	0.0272	0.0316	0.0187	0.0216
			168	0.0188	0.0155	0.0234	0.0159	0.015	0.0206	0.0141	0.018	0.016
MSgg (7% NaCl):			Time (h) Strain	SQR9			SQR9ΔbnaV			SQR9-P43-bnaAB
	Weight of biofilm (g)		24	0.0145	0.0195	0.0133	0.0071	0.0109	0.0089	0.0077	0.0101	0.0055
			32	0.0257	0.0234	0.0178	0.0105	0.009	0.0098	0.0093	0.0073	0.013
			48	0.0391	0.035	0.0451	0.0202	0.0275	0.0193	0.0193	0.0179	0.028
			72	0.0376	0.0505	0.0422	0.0294	0.0333	0.0496	0.0302	0.0277	0.0346
			96	0.0317	0.041	0.0424	0.0331	0.0333	0.0335	0.0263	0.027	0.0378
			120	0.0333	0.0369	0.0285	0.0203	0.0346	0.0224	0.0373	0.0169	0.0187
			144	0.0328	0.0235	0.0299	0.0282	0.0255	0.0146	0.0247	0.0243	0.0192
			168	0.0223	0.0161	0.0186	0.0206	0.0269	0.0161	0.027	0.0123	0.0137
