# Supplementary material for: A toxin-mediated policing system in Bacillus optimizes division of labor via penalizing cheater-like nonproducers
Source: eLife. 2023 Apr 25;12:e84743. doi: 10.7554/eLife.84743 (PMC10171868; doi:10.7554/eLife.84743)
Supplement: Figure 5—source data 3. [file elife-84743-fig5-data3.xlsx]

## Sheet: Sheet1
Figure 5 - Source Data 3
Figure 5F: Comparison of root colonization of wild-type SQR9, SQR9ΔbnaV, and SQR9-P43-bnaAB.
Summary Statistics (arithmetic from GraphPad Prism 8)							Sum Sq = Sum of squares;DF= degrees of freedom;Mean Sq = Mean Squares
	lgCFU/g root:
	ANOVA table	Sum Sq	DF	Mean Sq	F (DFn, DFd)	P value
	Treatment (between columns)	0.8699	2	0.4349	F (2, 6) = 71.97	P<0.0001
	Residual (within columns)	0.03626	6	0.006043
	Total	0.9061	8
Source Data
	lgCFU/g root:		SQR9	SQR9ΔbnaV	SQR9-P43-bnaAB
			7.48835	7.37328	6.74416
			7.6847	7.38002	6.90216
			7.59539	7.3352	6.89331
